# Supplementary material
Source: PubMed Central journal article supplement (PMC6481295)

**A**

|           |   |                                                              |     |
|-----------|---|--------------------------------------------------------------|-----|
| Nb33      | 1 | MAQVQLVESGGGLVLRPGGSRRLSCVDSERTSYPMGWFRAPGKEREFVASITWSGIDPTY |     |
| Nb39      | 1 | MAQVQLVESGGGLVLRPGGSLRLSCVDSERTSYPMGWFRAPGKEREFVASITWSGIDPTY |     |
| Nb41      | 1 | MAQVQLVESGGGLVLRPGGSLRLSCVDSERTSYPMGWFRAPGKEREFVASITWSGIDPTY |     |
| Nb44      | 1 | MAQVQLVESGGGLVLRPGGSLRLSCVDSERTSYPMGWFRAPGKEREFVASITWSGIDPTY |     |
| consensus | 1 | MAQVQLVESGGGLVLRPGGSLRLSCVDSERTSYPMGWFRAPGKEREFVASITWSGIDPTY | ↑↑↑ |

  

|           |    |                                                             |    |
|-----------|----|-------------------------------------------------------------|----|
| Nb33      | 61 | ADSVADRFTISRDVANNTLYLQMNLSLKHEDTAVYYCAARAPVQSSSPYDYDWGQGTQV |    |
| Nb39      | 61 | ADSVADRFTISRDVANNTLYLQMNLSLKHEDTAVYYCAARAPVQSSSPYDYDWGQGTQV |    |
| Nb41      | 61 | ADSVADRFTISRDVANNTLYLQMNLSLKHEDTAVYYCAARAPVQSSSPYDYDWGQGTQV |    |
| Nb44      | 61 | ADSVADRFTISRDVANNTLYLQMNLSLKHEDTAVYYCAARAPVQSSSPYDYDWGQGTQV |    |
| consensus | 61 | ADSVADRFTISRDVANNTLYLQMNLSLKHEDTAVYYCAARAPVQSSSPYDYDWGQGTQV | ↑↑ |

  

|           |     |       |  |
|-----------|-----|-------|--|
| Nb33      | 121 | TVSSA |  |
| Nb39      | 121 | TVSSA |  |
| Nb41      | 121 | TVSSA |  |
| Nb44      | 121 | TVSSA |  |
| consensus | 121 | TVSSA |  |

→ Mapped interaction sites with μOR:  
I56, P58, T59, T69, S71, V102

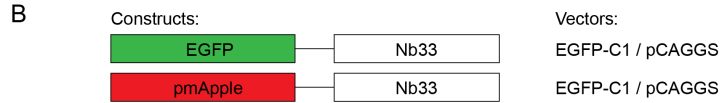

**C**

|          |   |                                                              |  |
|----------|---|--------------------------------------------------------------|--|
| Mu-OR    | 1 | MDSSAGPGNISDCSDPLAPASCSPAP-GSWINLSHVDGNQSDPCGPNRIQLGESHSLCFQ |  |
| Delta-OR | 1 | MDL-----VPSARAELOSPLVNLSDAFPSAFPSSACANAGSGPCARS---           |  |

  

|          |    |                                                               |  |
|----------|----|---------------------------------------------------------------|--|
| Mu-OR    | 60 | TCSPSIVTALITIMALYSIVCVVGLFENFLVMIVIVRYTKIKTATNIYIFNLALADALATS |  |
| Delta-OR | 43 | --ASSIALALAIATALYSAVCAVGLLGNVLMVIGIVRYTKIKTATNIYIFNLALADALATS |  |

  

|          |     |                                                            |       |
|----------|-----|------------------------------------------------------------|-------|
| Mu-OR    | 120 | TLPFQSVNYLMGTWPFENLCKAVLSIDYNNMETSIFTLTMSVDRYIAVCHPVKALDFR | ↓ ↓ ↓ |
| Delta-OR | 101 | TLPFQSAKYLMGTWPFENLCKAVLSIDYNNMETSIFTLTMSVDRYIAVCHPVKALDFR |       |

  

|          |     |                                                             |  |
|----------|-----|-------------------------------------------------------------|--|
| Mu-OR    | 180 | TBRNAKIVNVCNMLSSAIGLPMFMATIKYRQGSIDETLTFSHPIWYWFNLIKICVETLF |  |
| Delta-OR | 161 | TEAKAKLINICITWLASGVGPIVMVAVQPRDGAIVCMLOFPSWYWFNLIKICVETLF   |  |

  

|          |     |                                                             |   |
|----------|-----|-------------------------------------------------------------|---|
| Mu-OR    | 240 | AFVYVPLIITVCYGLMLLRLSVRMLSGSKEKDRSLRRITRMVLVVVCAEVWCWAPIHIY | ↓ |
| Delta-OR | 221 | AFVYVPLIITVCYGLMLLRLSVRMLSGSKEKDRSLRRITRMVLVVVCAEVWCWAPIHIY |   |

  

|          |     |                                                               |   |
|----------|-----|---------------------------------------------------------------|---|
| Mu-OR    | 300 | VIKKALITIPETT-FQTVSWHFCIALGYTNSCLNPVLYAFLDENFKRCFRFCIPTSSTI   | ↓ |
| Delta-OR | 281 | VIKWTLVDINRRDELVVAALFLCIALGYANSSCLNPVLYAFLDENFKRCFRQLCRTPCGRQ |   |

  

|          |     |                                         |  |
|----------|-----|-----------------------------------------|--|
| Mu-OR    | 359 | EQNSARIRQNRREHPSTANTVDRTNHQLENLEAETAPLE |  |
| Delta-OR | 341 | EPGSLRRPRQATTRERVTAETESGPGGGAAA-----    |  |

→ Mapped interaction sites with Nb39:  
P172, L176, R179, E270, N342

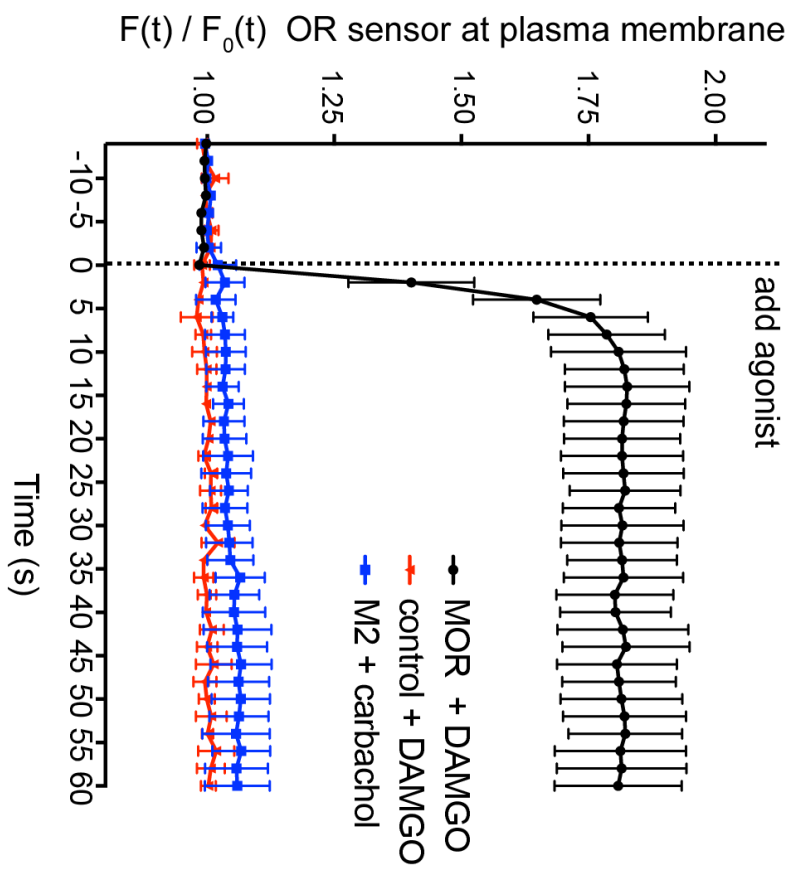

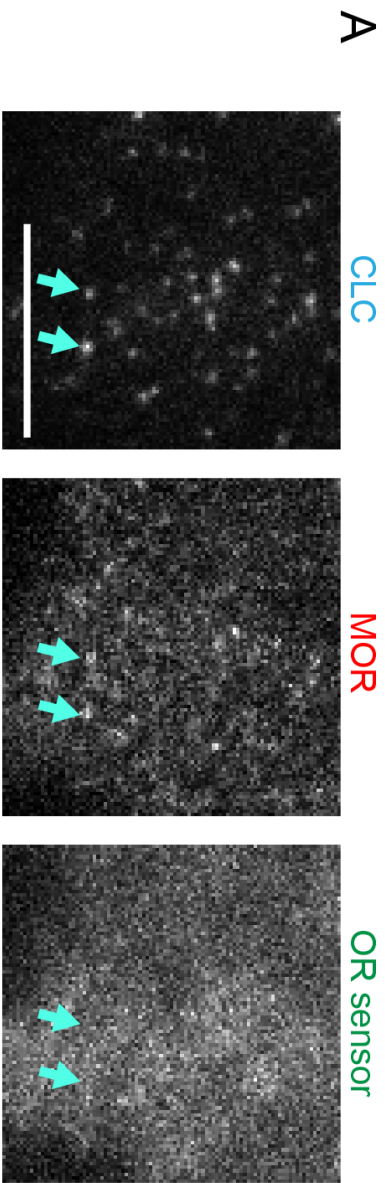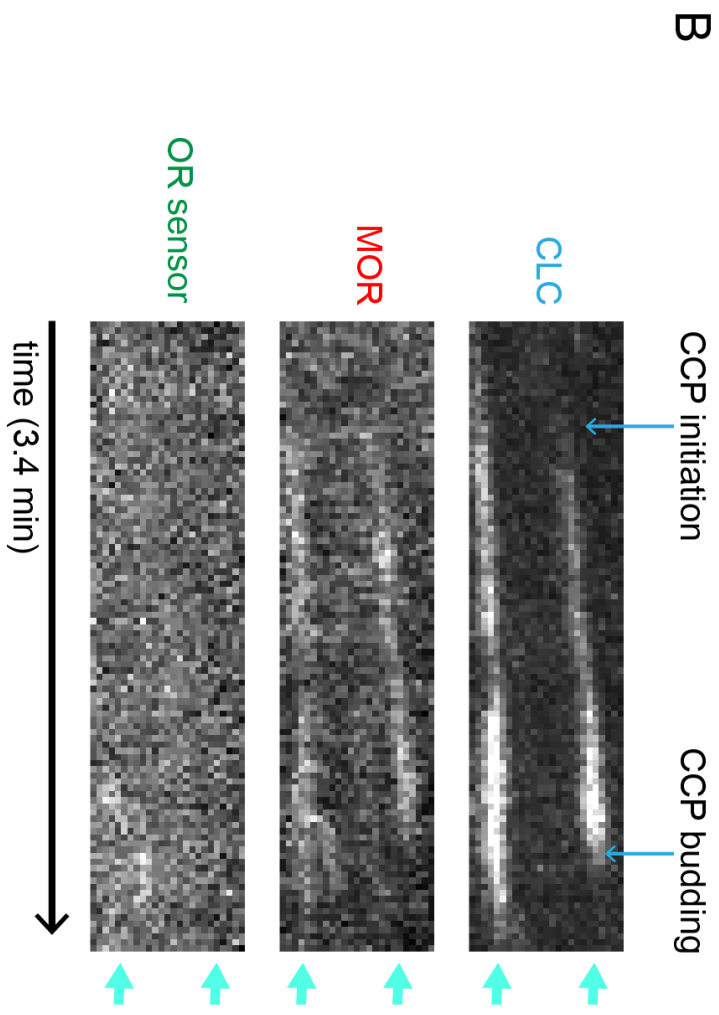

A

before agonist

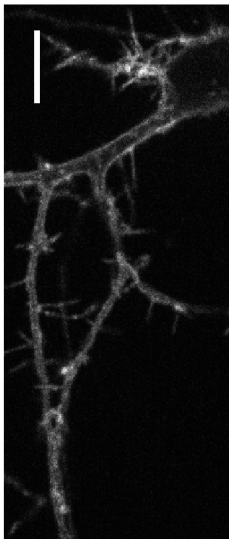

DOR

pmApple-OR sensor

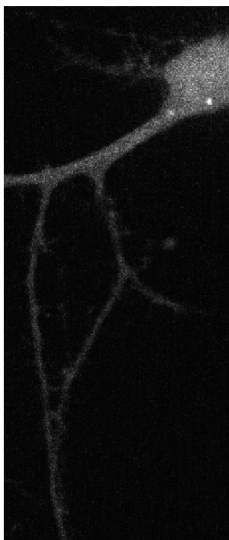

DADLE  
(15 min)

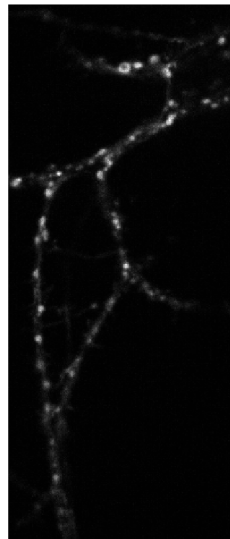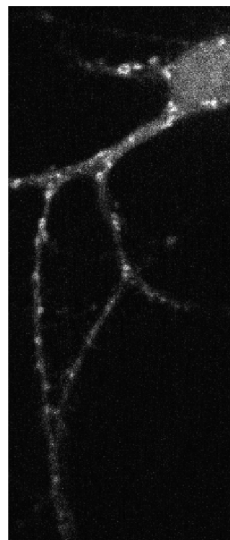

B

before agonist

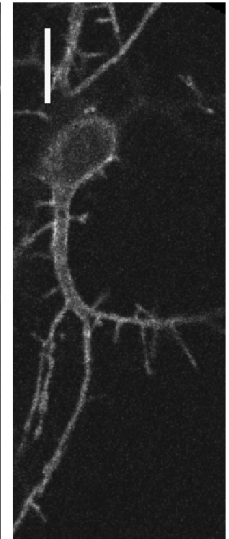

DOR

pmApple-OR sensor

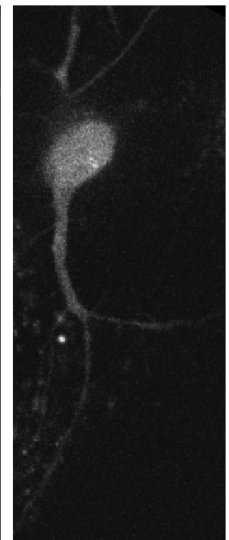

DPDPE  
(15 min)

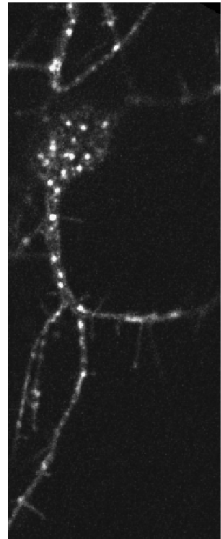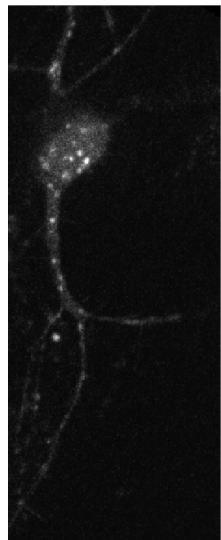

C

before agonist

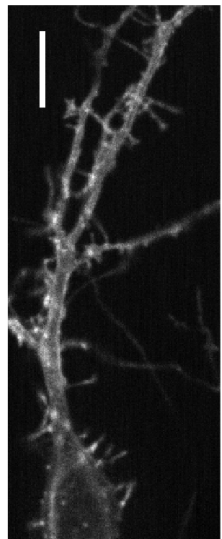

DOR

EGFP-OR sensor

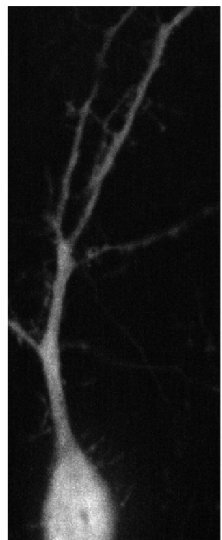

Deiorphin II  
(15 min)

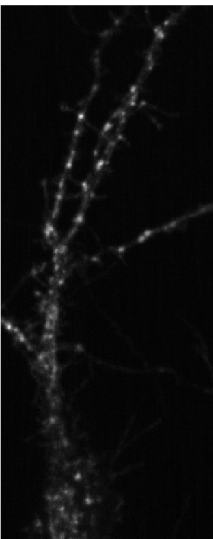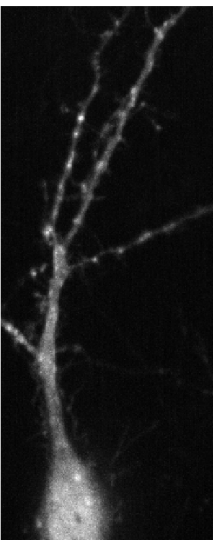

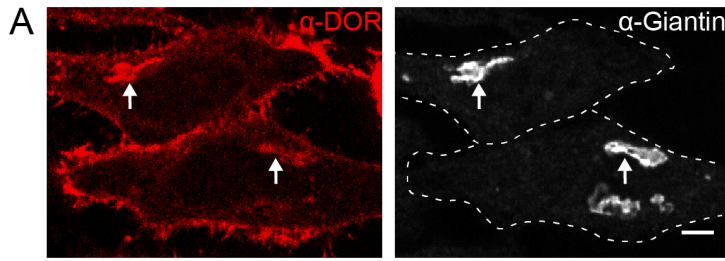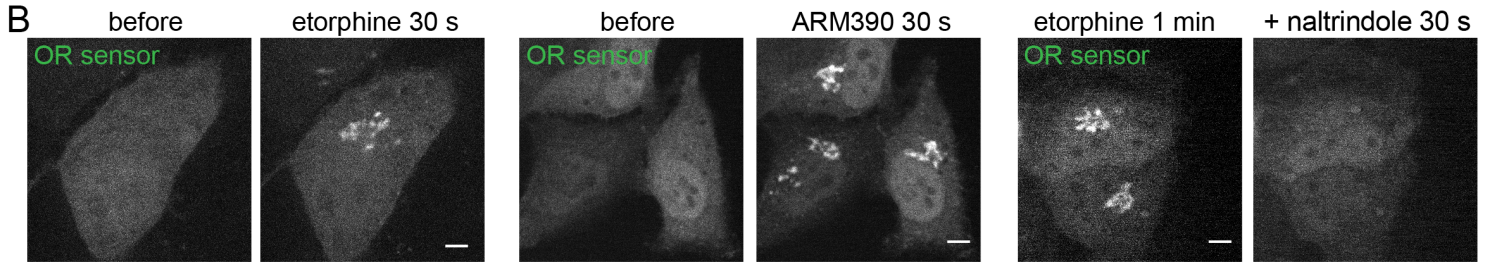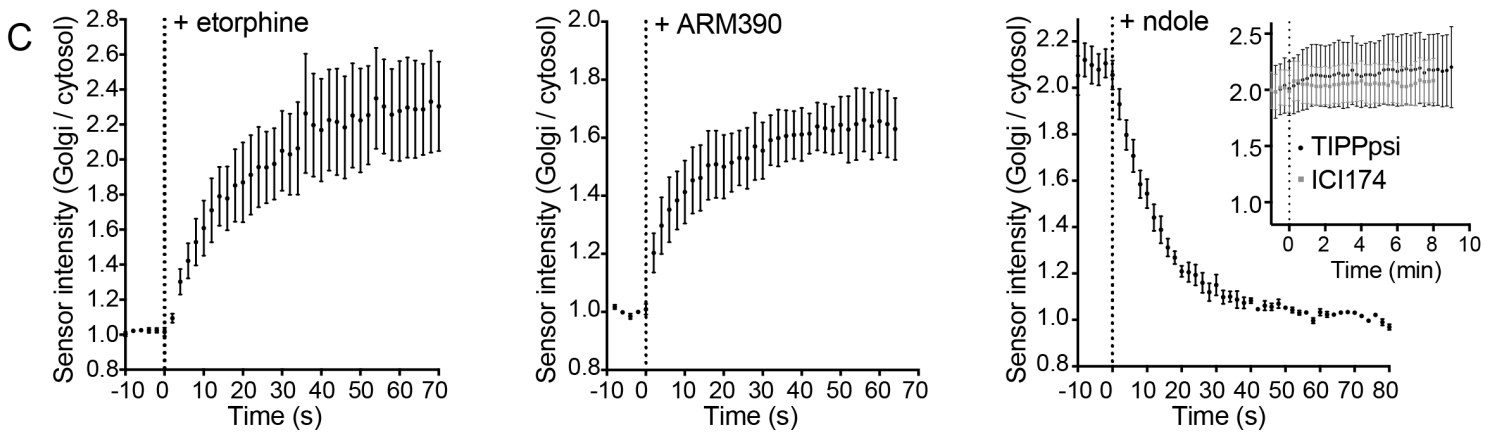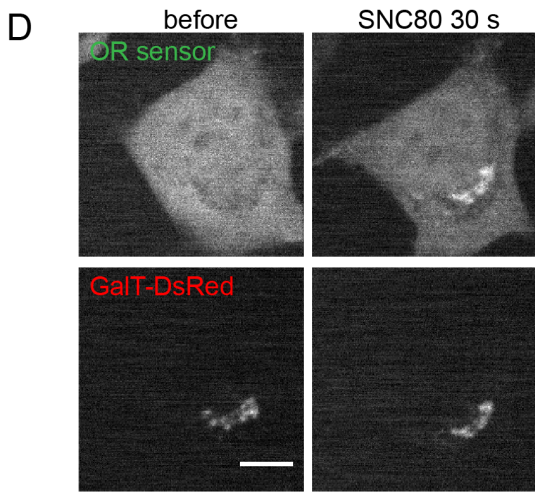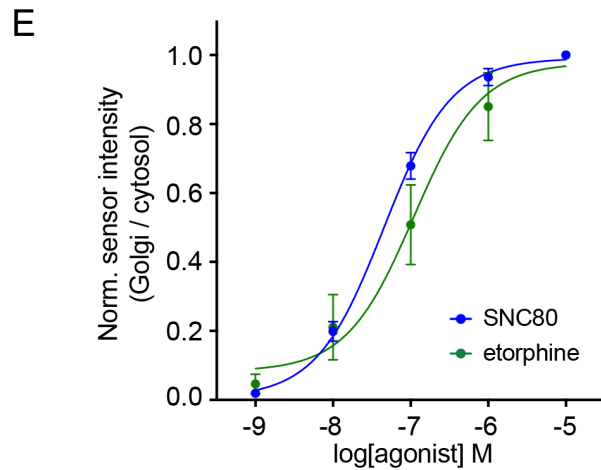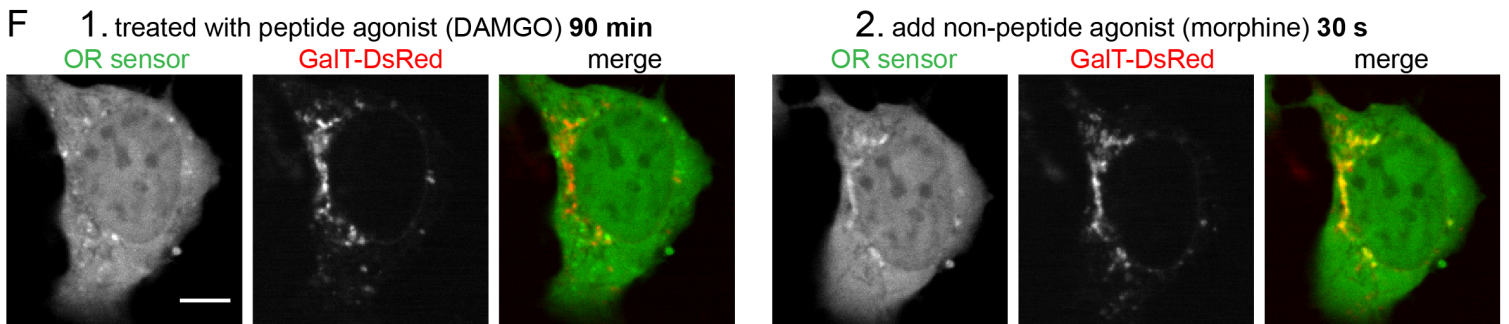

A

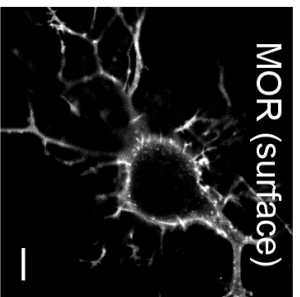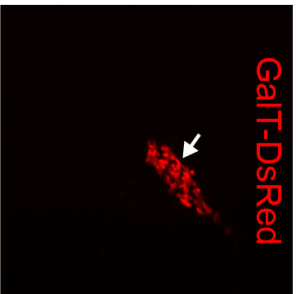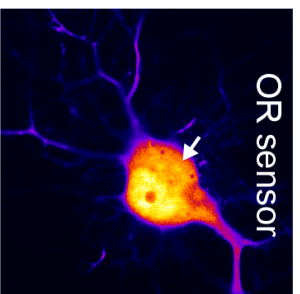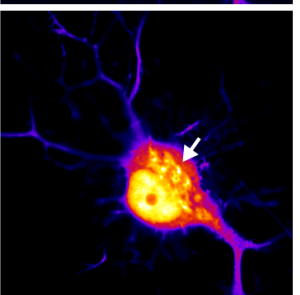

before agonist

+ etorphine 20 s

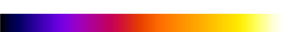

B

+ etorphine 15 min

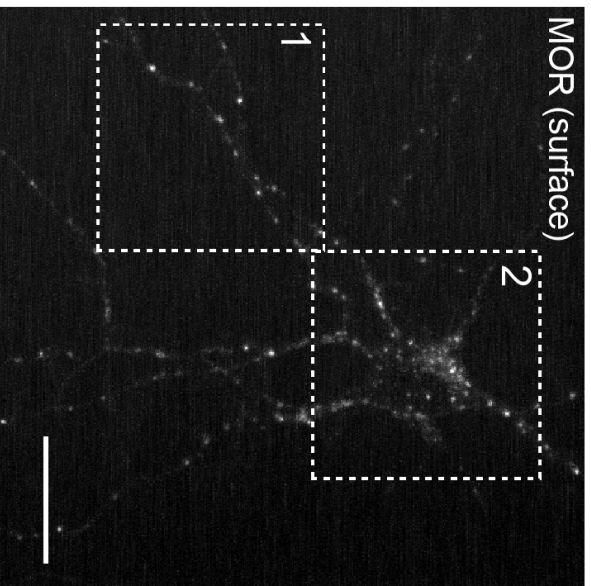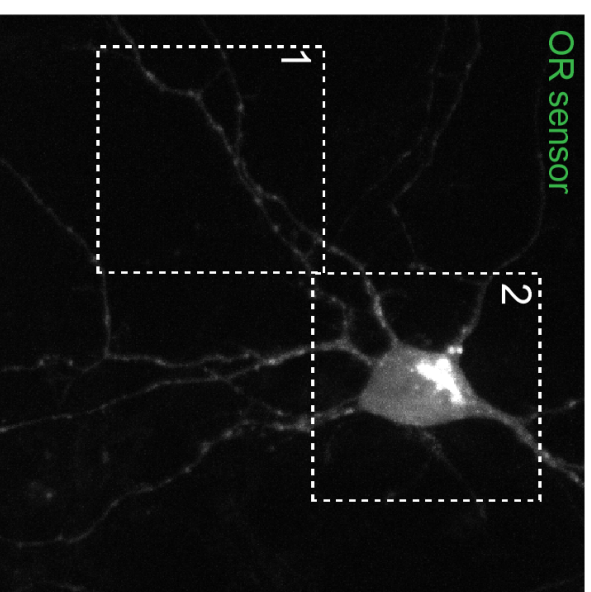

Region 1

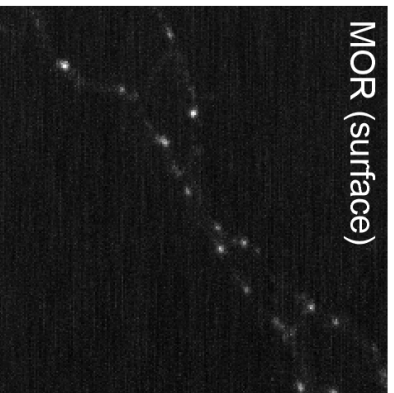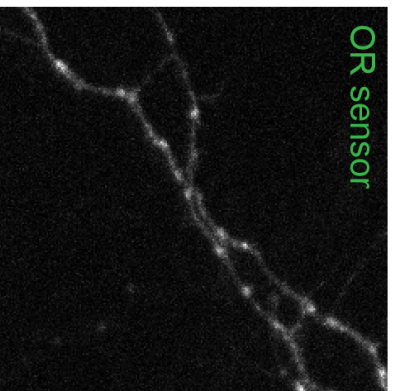

Region 2

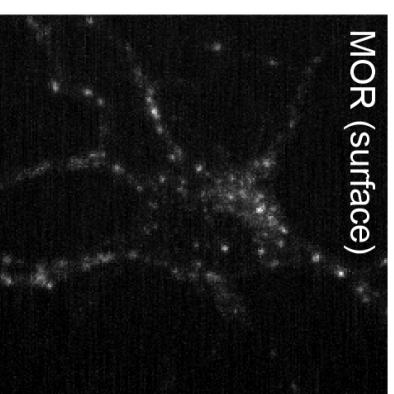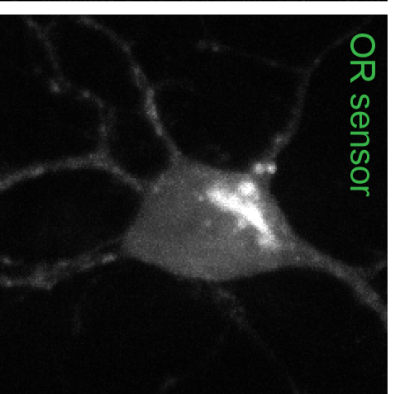

Supplement: NIHMS1013218-supplement-supplemental_figures.pdf [file NIHMS1013218-supplement-supplemental_figures.pdf]
