# Supplementary material
Source: PubMed Central journal article supplement (PMC6481295)
Supplement: NIHMS1013218-supplement-Supplemental_figure_and_movie_legends.pdf [file NIHMS1013218-supplement-Supplemental_figure_and_movie_legends.pdf]

## Supplementary Figures

### Figure S1. Related to Figure 1.

(A) Sequences of nanobodies tested in this study. Alignment shows residues that vary between individual nanobodies. Red arrows: interactions between Nb39 and MOR (Huang et al., 2015). (B) Fluorescent protein-nanobody (Nb33) fusion constructs used in this study for expression in HEK293 and HeLa cells (EGFP-C1) and primary striatal neurons (pCAGGS). (C) Alignment of murine MOR and DOR sequences. Green arrows: interactions between MOR and Nb39 (Huang et al., 2015).

### Figure S2. Related to Figure 1.

EGFP-OR-sensor fluorescence intensity time course measured by TIR-FM time-lapse acquisition of HEK293 cells expressing OR-sensor and FLAG-MOR (black, n=3), control plasmid (red, n=3), or FLAG-muscarinic acetylcholine receptor (M2, blue, n=3). Cells were stimulated with DAMGO (1  $\mu$ M), or carbachol (10  $\mu$ M) by bath application.  $F_0$  = average fluorescence signal before agonist addition. Average  $\pm$  sem.

### Figure S3. Related to Figure 2.

(A) TIR-FM images of a time series of a HEK293 cell, co-expressing clathrin-light-chain (CLC)-DsRed, FLAG-MOR (surface-labeled with M1-AF647) and EGFP-OR-sensor, 3 min after DAMGO (10  $\mu$ M) treatment. Scale bar 10  $\mu$ m. Arrows indicate the clathrin-coated pits analyzed in kymograph presented in (B). (B) 3.4 min kymograph of the TIRF image series shown in (A), starting 20s after adding DAMGO (10  $\mu$ M). Top arrows indicate individual CCP initiation and budding events. Right arrows show location of CCPs corresponding to the CCPs highlighted in (A).

### Figure S4. Related to Figure 4.

Confocal images of striatal neurons (12-14 DIV) expressing FLAG-DOR (surface-labeled with M1-AF647) and pmApple- or EGFP-OR-sensor, before and 15 min after adding (A) DADLE (10  $\mu$ M), (B) DPDPE (10  $\mu$ M), or (C) Deltorphine II (10  $\mu$ M). Scale bars: 10  $\mu$ m.

### Figure S5. Related to Figure 5.

(A) Confocal images of HeLa cells, expressing FLAG-DOR. Cells were fixed, permeabilized, and immunolabelled with anti-FLAG (red) and anti-Giantin (grey) antibodies. The internal OR pool co-localizes with Golgi marker (arrows). (B) Confocal images of a time series of HeLa cells, expressing EGFP-OR-sensor, GalT-DsRed (not depicted), and FLAG-DOR (not depicted). OR-sensor localization is shown before and 20 s after adding: left: etorphine, middle: ARM390. Right: etorphine (1 min), followed by naloxone (30 s). Examples of image series used to determine kinetics of Golgi activation shown in (C). (C) Quantification and kinetics of EGFP-OR-sensor intensity at Golgi apparatus upon agonist or antagonist addition in HeLa cells, expressing OR-sensor, GalT-DsRed, and DOR. GalT-marked Golgi apparatus was used as quantification mask. Time series with 2 s intervals for non-peptide ligands or 15 s intervals for peptide antagonists (TIPPpsi, ICI174). 1  $\mu$ M etorphine n=4, 10  $\mu$ M ARM390 n=4, 1  $\mu$ M etorphine followed by 10  $\mu$ M naltrindole (ndole) n=4, or by TIPPpsi n=5, or by ICI-174 n=6. Average  $\pm$  sem. (D) Confocal images of a HEK cell, expressing EGFP-OR-sensor, GalT-DsRed and FLAG-DOR (not shown) before and after addition of SNC80 (10  $\mu$ M). (E) Ligand concentration-dependent recruitment of OR-sensor to DOR in the Golgi apparatus (n=4, average  $\pm$  sem). GalT was used as quantification mask in confocal time-lapse series and OR-sensor signal normalized to cytosolic pool. Normalization of EGFP-intensity values (range [0-1]). Regression curves with Hill slope of 1. EC50: SNC80: 45 nM, etorphine: 110 nM. (F) Confocal images of a time series of a HEK cell, expressing EGFP-OR-sensor, GalT-DsRed, and FLAG-MOR (not shown). Cell was treated with

DAMGO (10  $\mu$ M) for 90 min. Left: no overlap between OR-sensor and GalT. Right: addition of morphine (1  $\mu$ M) for 30 s produces recruitment of OR-sensor to the Golgi marked by GalT. All scale bars: 10  $\mu$ m.

### **Figure S5. Related to Figure 6.**

**(A)** Soma of striatal neuron (14 DIV), expressing FLAG-MOR (surface-labeled with M1-AF647), GalT-DsRed, and OR-sensor (pseudocolored low to high intensity). OR-sensor distribution is depicted before agonist and 20 s after adding etorphine (1  $\mu$ M). **(B)** Striatal neuron (12 DIV), expressing FLAG-MOR (surface-labeled with M1-AF647), and OR-sensor, treated with etorphine (1  $\mu$ M) for 15 min. Boxed areas are displayed below. Region 1: Co-localization of internalized MOR and OR-sensor in puncta along dendrites. Region 2: OR-sensor is recruited to Golgi apparatus, surface-labeled receptors are not enriched in this location. Scale bars: 10  $\mu$ m.

## **Supplementary Movies**

### **Movie S1. Related to Figure 1.**

TIR-FM time series of a HEK293 cell expressing EGFP-OR-sensor (and MOR, not shown). Media changes to 1  $\mu$ M DAMGO (t = 110 s) or 10  $\mu$ M naloxone (t = 410 s) by perfusion. Time between frames 2 s. Total movie length: 11:30 min.

### **Movie S2. Related to Figure 2.**

Confocal time series of a HEK293 cell, expressing FLAG-MOR (red, surface-labeled with anti-FLAG M1-AF555) and EGFP-OR-sensor (green). 10  $\mu$ M DAMGO was added at t=0 s. Time between frames 2 s. Total movie length: 10:30 min.

### **Movie S3. Related to Figure 2.**

Confocal time series of a HEK293 cell, expressing FLAG-DOR (red, surface-labeled with anti-FLAG M1-AF555) and EGFP-OR-sensor (green). 10  $\mu$ M DADLE was added at t=0 s. Time between frames 5 s. Total movie length: 8:20 min.

### **Movie S4. Related to Figure 4.**

Confocal time series of a striatal neuron (12 DIV), expressing FLAG-MOR (red, surface-labeled with M1-AF555) and EGFP-OR-sensor (grey). 10  $\mu$ M DAMGO was added at t=0 s. Time between frames 5 s. Total movie length: 16:30 min.

### **Movie S5. Related to Figure 5.**

Confocal time series of a HEK293 cell, expressing FLAG-MOR (red, surface-labeled with anti-FLAG M1-AF555) and EGFP-OR-sensor (green). 1  $\mu$ M Etorphine was added at t=0 s. Time between frames 2 s. Total movie length: 11 min.

### **Movie S6. Related to Figure 5.**

Confocal time series of a HEK293 cell, expressing MOR( $\mu$ OR)-GFP (green) and mCherry-OR-sensor (red). 1  $\mu$ M morphine was added at t=0 s. Time between frames 2 s. Total movie length: 2:30 min.

### **Movie S7. Related to Figure 6.**

Confocal time series of a striatal neuron (14 DIV), expressing EGFP-OR-sensor (green) and GalT-DsRed (and FLAG-MOR, not depicted). 1  $\mu$ M morphine was added at t=0 s. Time between frames 2 s. Total movie length: 3:40 min.
